# Supplementary material for: Modulation of deregulated chaperone-mediated autophagy by a phosphopeptide
Source: PubMed Central journal article supplement — Autophagy. 2015 Feb 26;11(3):472–86. doi: 10.1080/15548627.2015.1017179 (PMC4502742; doi:10.1080/15548627.2015.1017179), 2015-02-26
Supplement: kaup-11-03-1017179-s001.pdf [file kaup-11-03-1017179-s001.pdf]

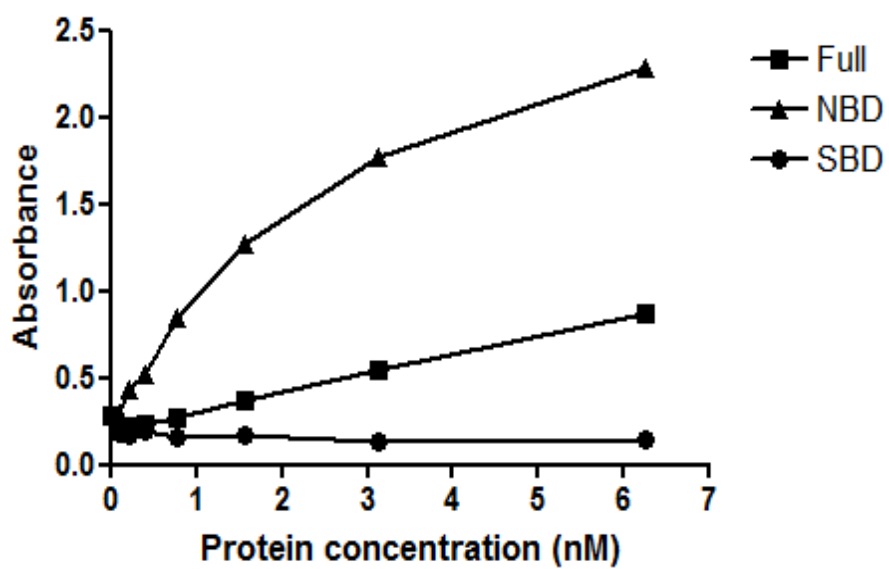

Supplemental Figure S1

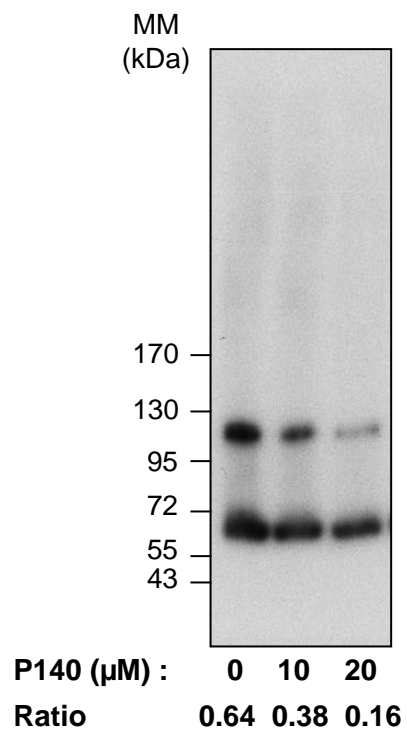

**Supplemental Figure S2**

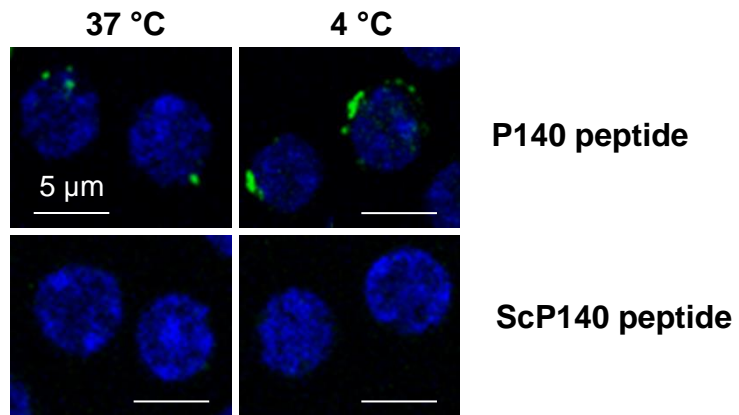

**Supplemental Figure S3**

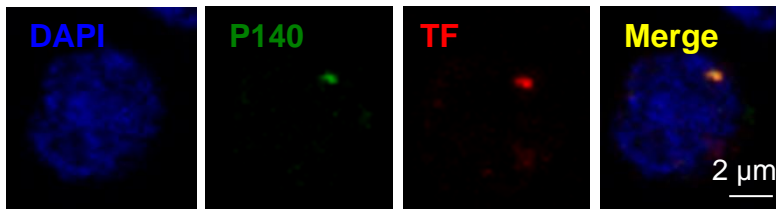

**Supplemental Figure S4**

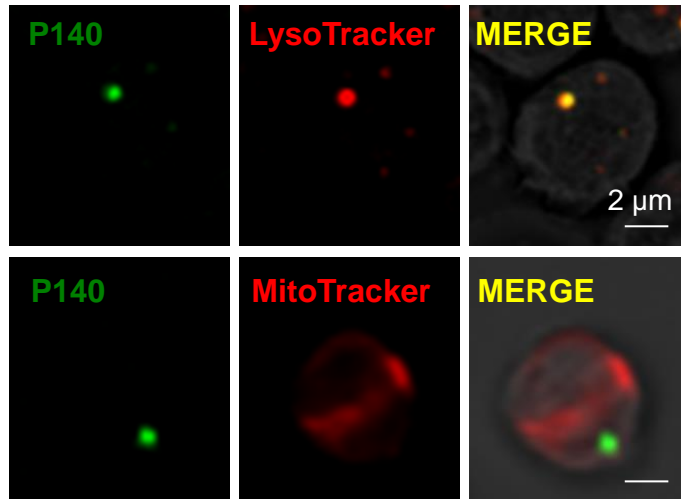

**Supplemental Figure S5**

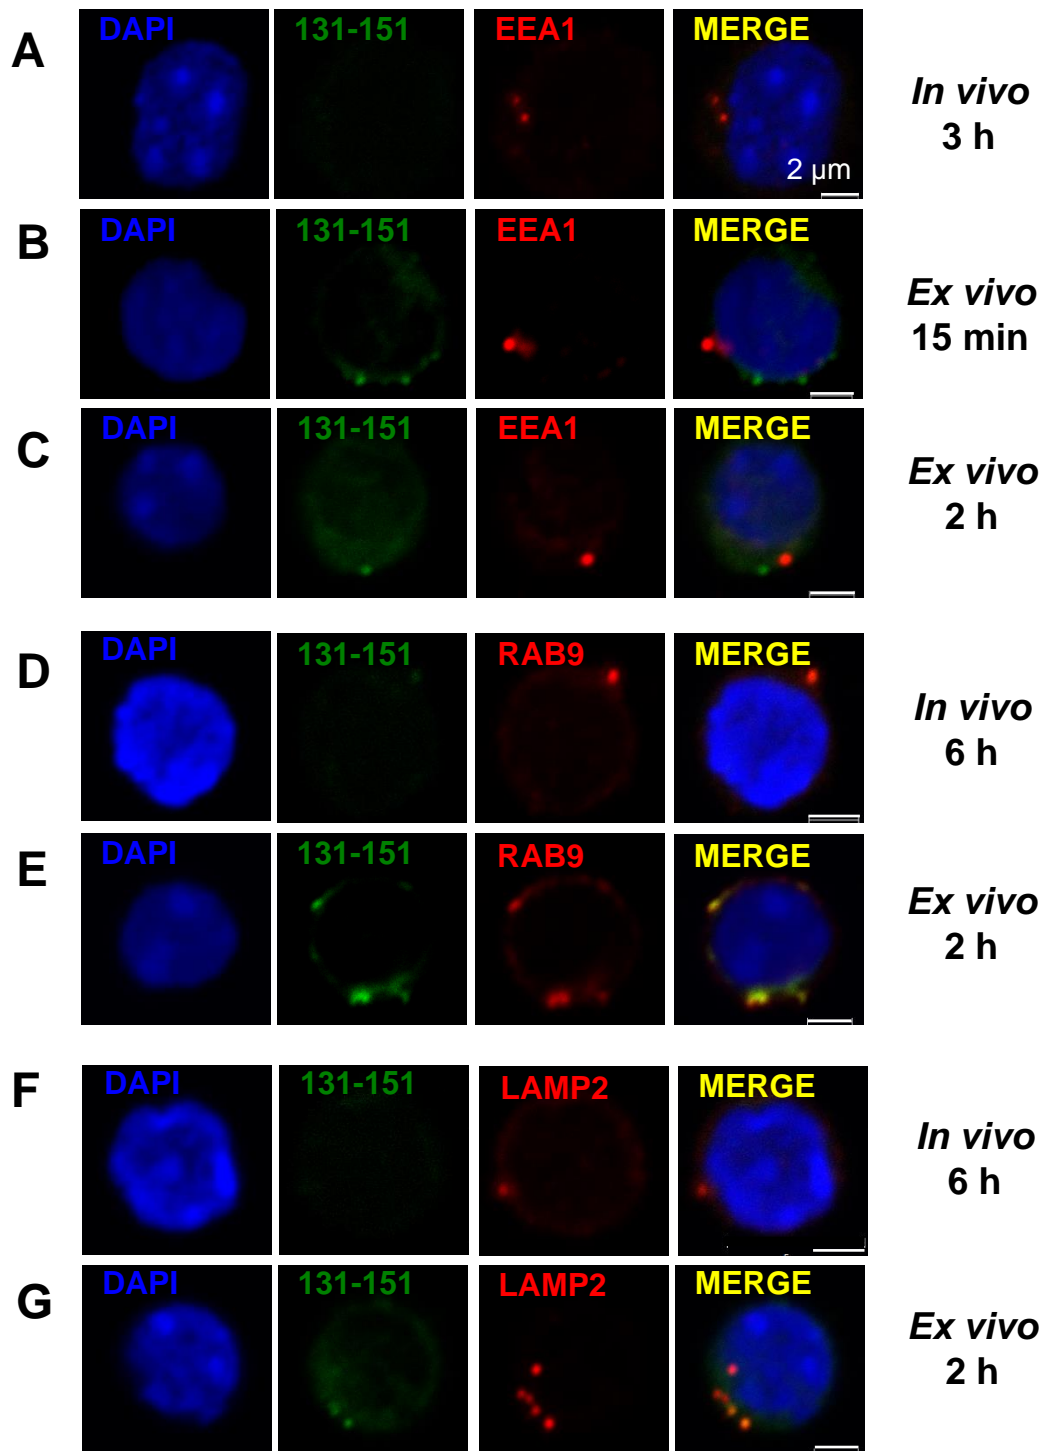

Supplemental Figure S6

**A** R I H M V Y S K R **S** G K P R G Y A F I E Y

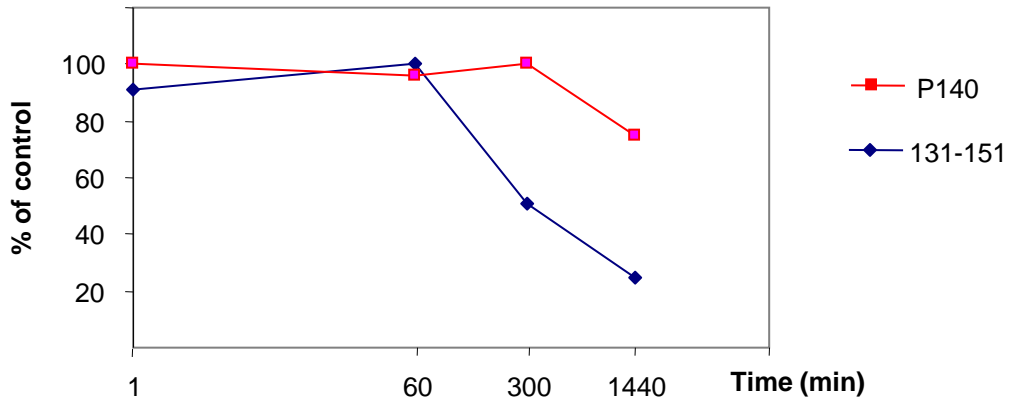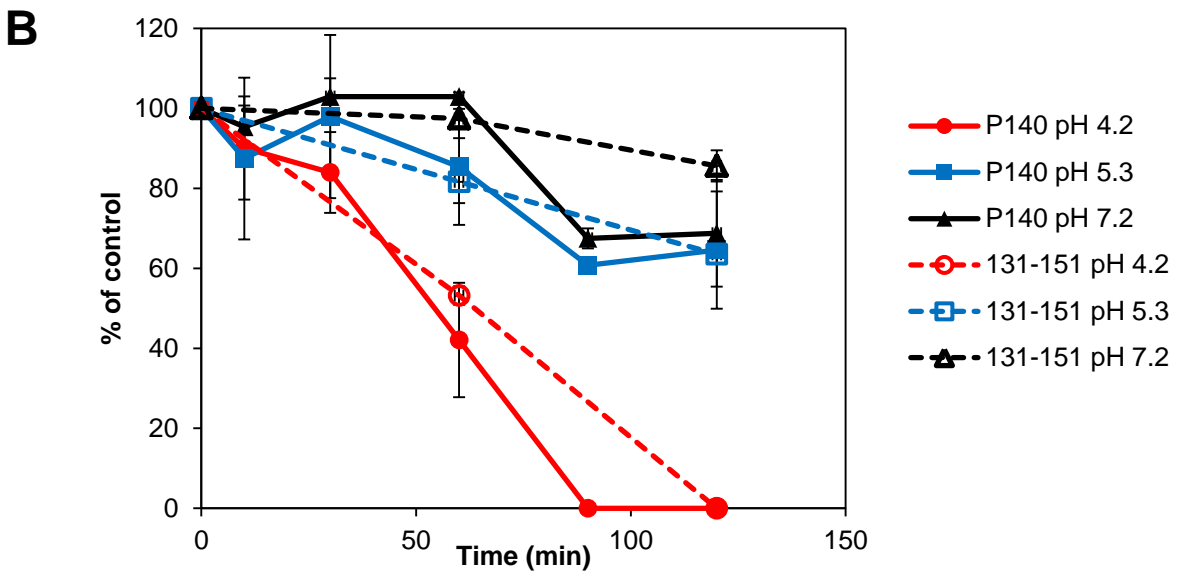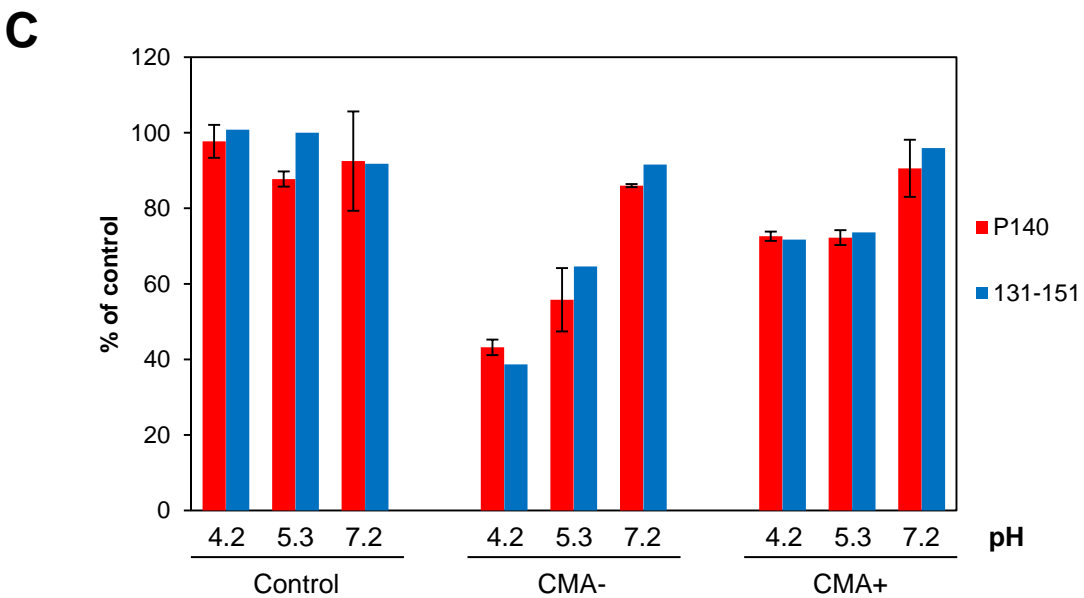

0 h

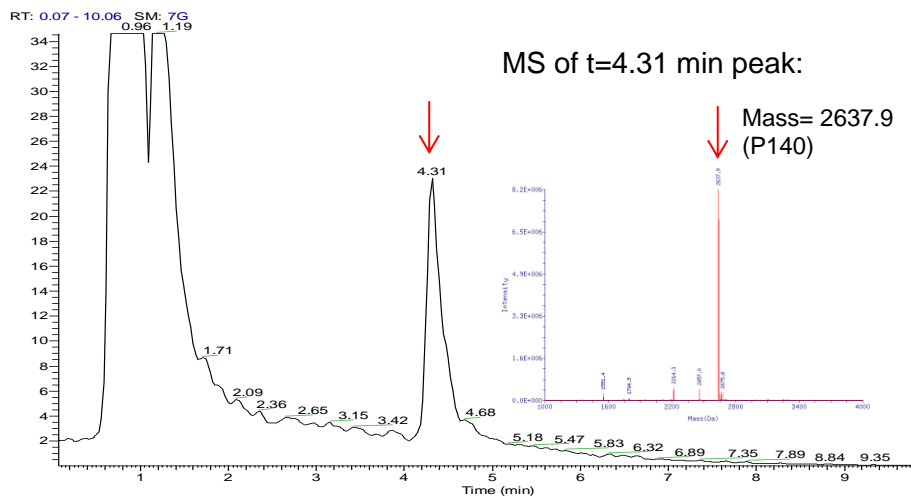

2 h

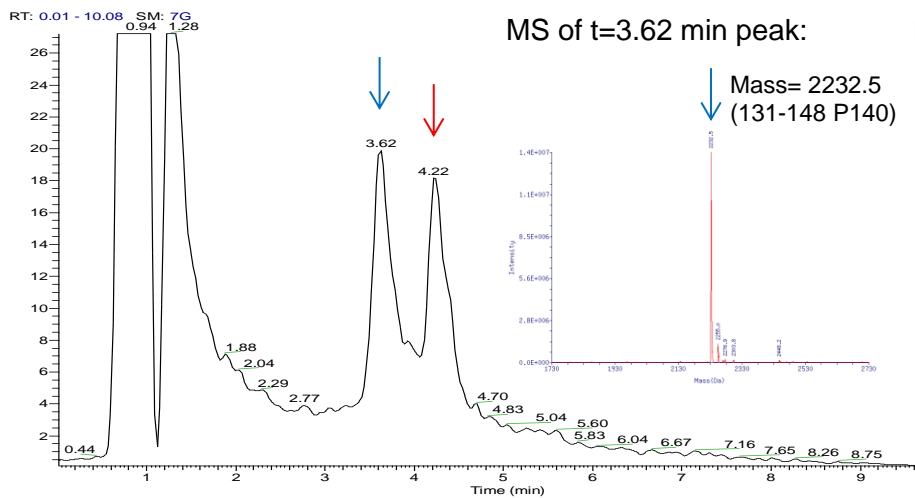

MS of t=4.22 min peak:

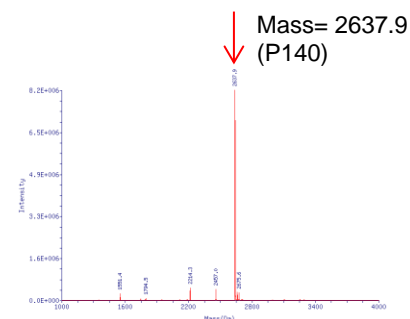

4 h

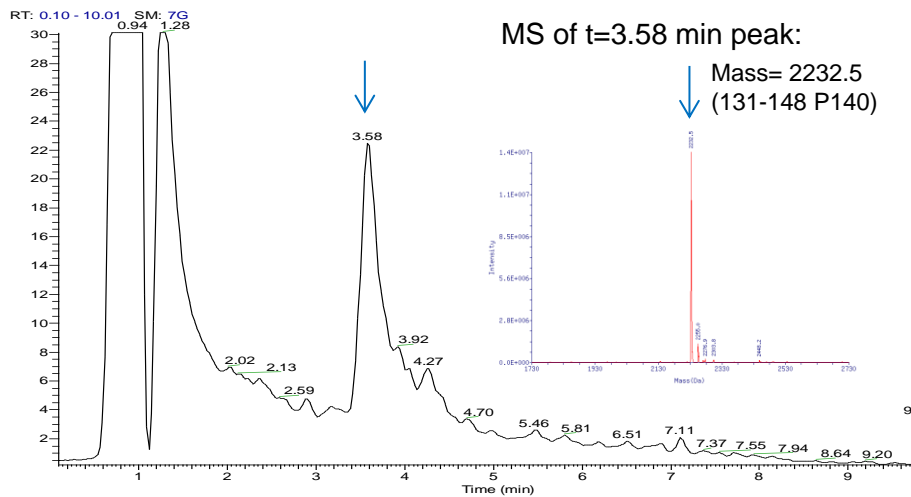



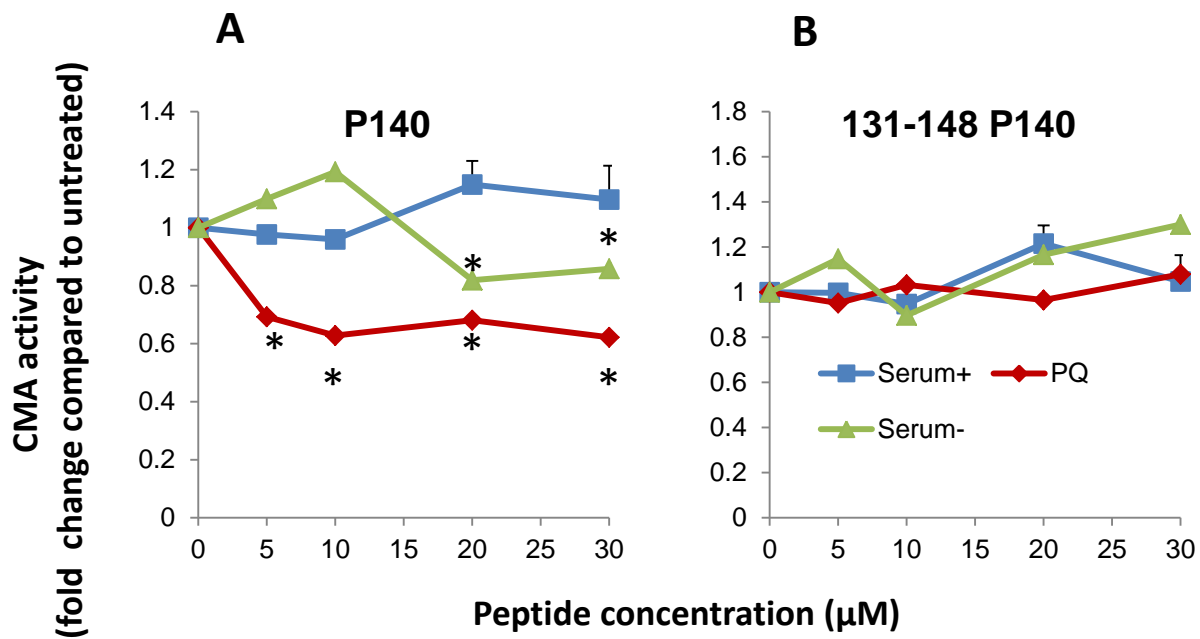

Supplemental Figure S9

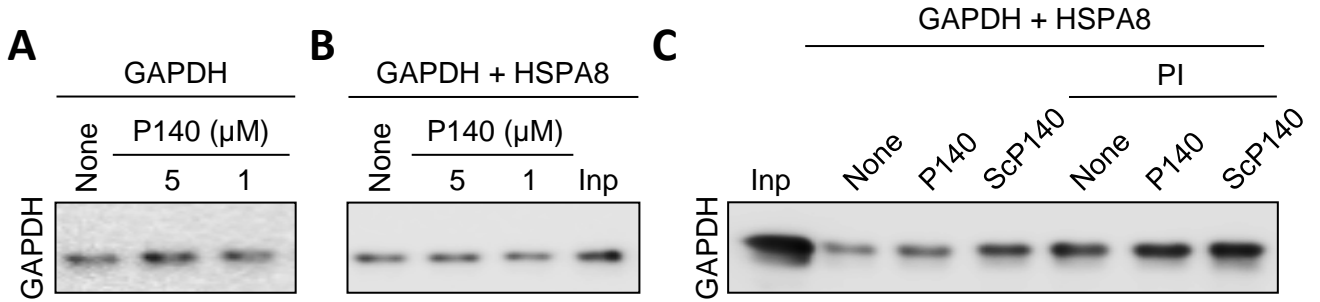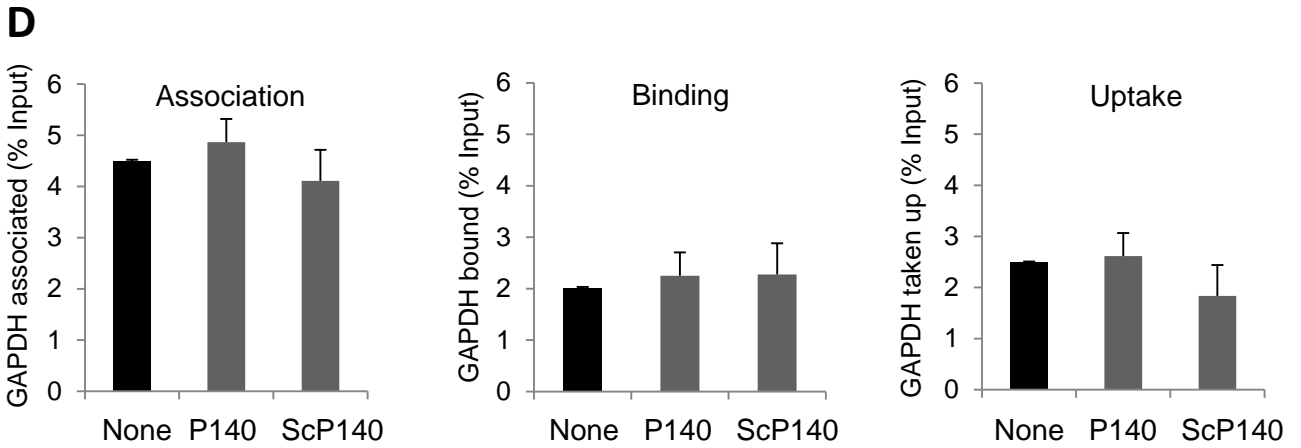

**Supplemental Figure S10**

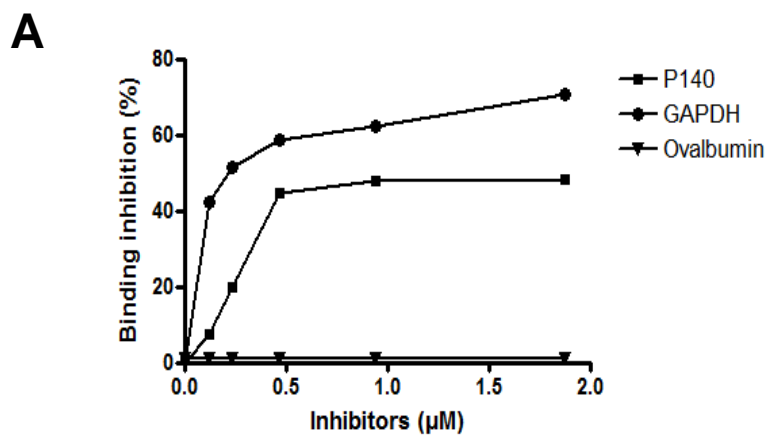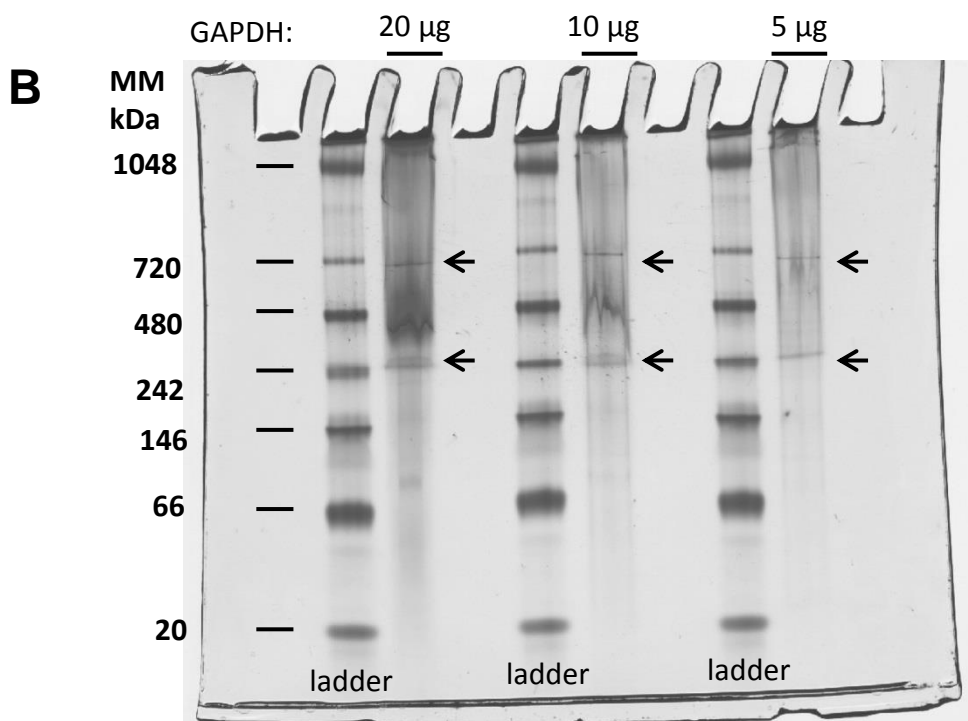

Supplemental Figure S11

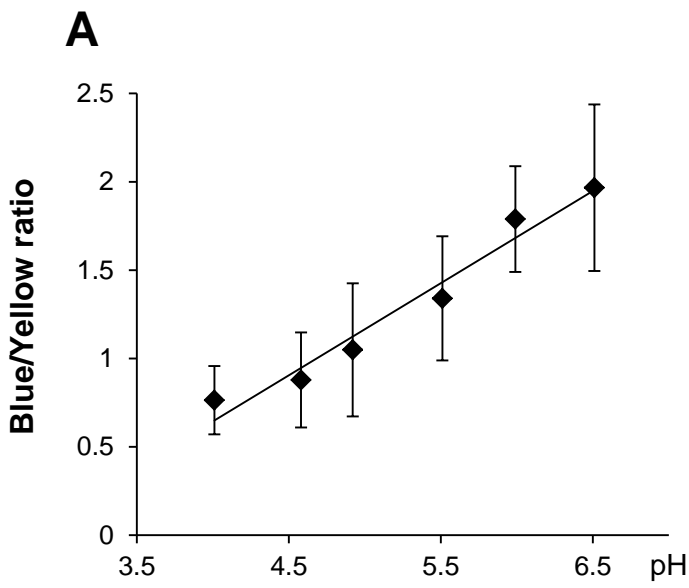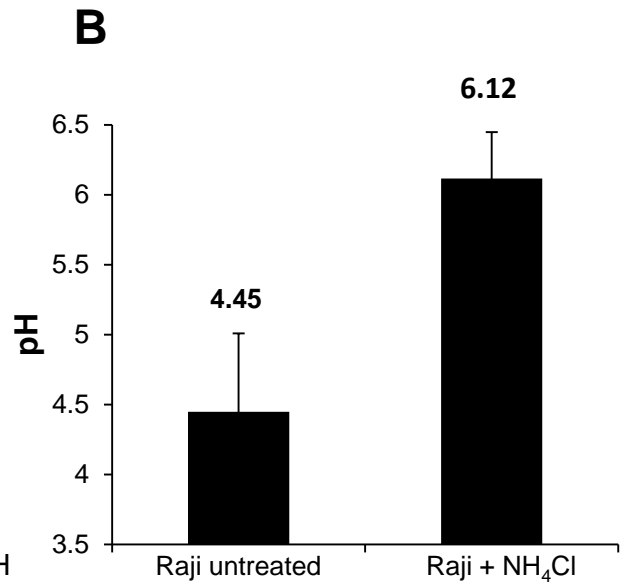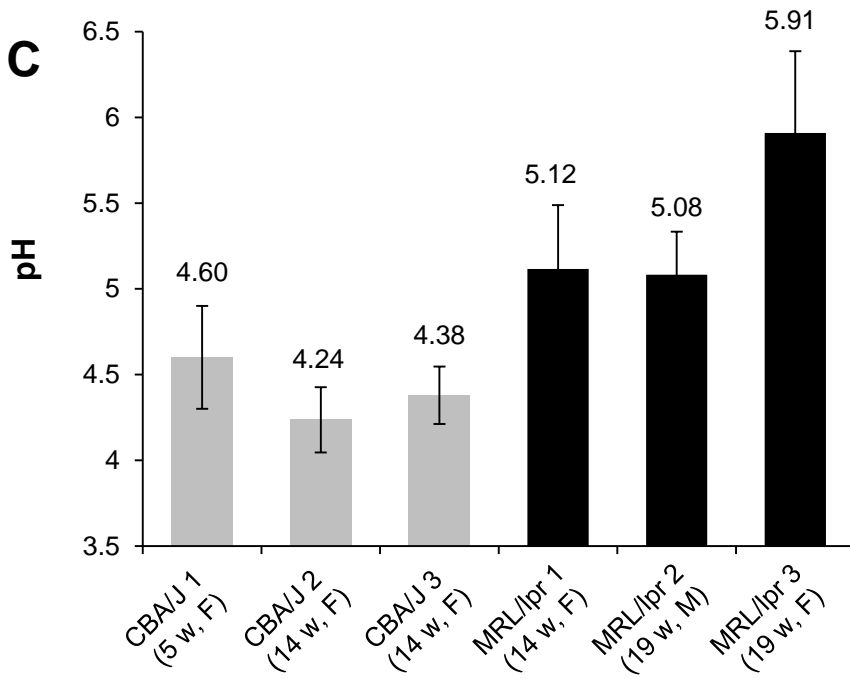

**Supplemental Figure S12**

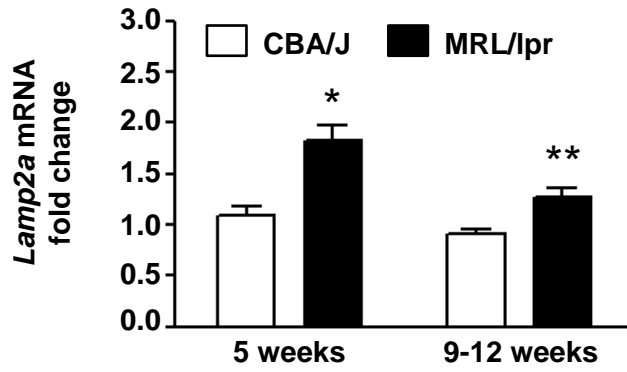

Supplemental Figure S13
